# Supplementary material for: Small-size and monodispersed red-emitting Pr3+ doped barium molybdate nanocrystals with ultrahigh color purity
Source: Royal Society of Chemistry journal article supplement (doi:10.1039/c6ra14222b), 2016-01-01
Supplement: c6ra14222b1.pdf [file c6ra14222b1.pdf]

# Small-size and Monodispersed Red-Emitting Pr<sup>3+</sup> doped Barium Molybdate Nanocrystals with Ultrahigh Color Purity

Xuyong Yang\*, Fei Huang, Zhenwei Huang, Fan Cao, Jianhua Zhang\*

Key Laboratory of Advanced Display and System Applications, Education of Ministry, Shanghai University, 149 Yanchang Road, P. R. China 200072

\*E-mail: yangxy@shu.edu.cn; jhzhzhang@shu.edu.cn

SI-1.

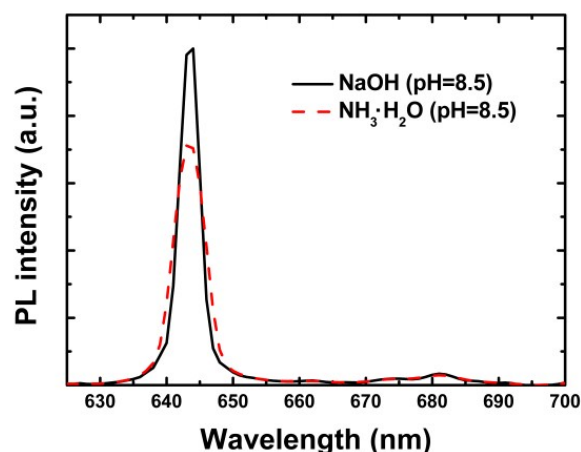

Figure S1. Comparison for the PL emission intensity of the as-prepared BaMoO<sub>4</sub>: Pr<sup>3+</sup> nanocrystals containing Na<sup>+</sup> ions and BaMoO<sub>4</sub>: Pr<sup>3+</sup> nanocrystals without Na<sup>+</sup> ions under 450 nm excitation.

SI-2.

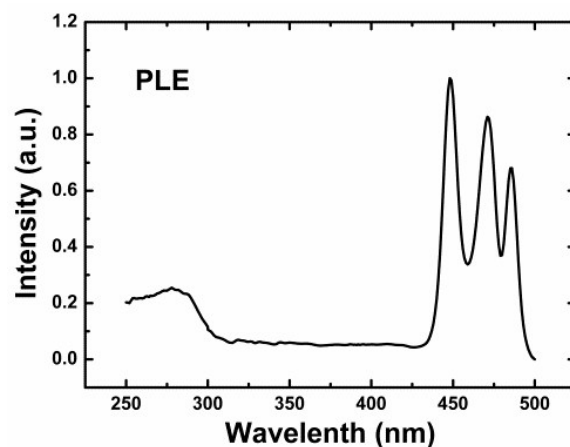

Figure S2. PL excitation spectrum of the as-prepared BaMoO<sub>4</sub>: Pr<sup>3+</sup> nanocrystals (from 250 to 500 nm).
